# Supplementary material for: The Peptide LLTRAGL Derived from Rapana venosa Exerts Protective Effect against Inflammatory Bowel Disease in Zebrafish Model by Regulating Multi-Pathways
Source: MDPI journal article supplement (doi:10.3390/md22030100), 2024-02-22
Supplement: s1 [file s1]

## Supplementary Materials

**Table S1. Upregulation and downregulation of TOP10 genes in TNBS vs Control and LLTRAGL vs TNBS**

| TNBS-vs-Control |                  | LLTRAGL-vs-TNBS  |                   |
|-----------------|------------------|------------------|-------------------|
| Up              | Down             | Up               | Down              |
| hp              | taar11           | LOC110439586     | si:dkey-108k21.15 |
| LOC110438125    | v2ra18           | LOC100148249     | zgc:163040        |
| LOC103910140    | LOC103910196     | il19l            | si:dkey-261m9.6   |
| zgc:162999      | LOC108191611     | LOC108191752     | xcr1b.2           |
| ifit15          | LOC110439303     | si:ch211-161n3.3 | si:dkey-210i3.1   |
| LOC100537673    | slc2a9l1         | LOC101885672     | hsd17b1           |
| LOC103909700    | LOC101883276     | LOC110439111     | LOC100005207      |
| plac8.2         | LOC110438230     | LOC798286        | si:ch211-113j13.2 |
| saa             | si:dkey-23a13.17 | LOC110438230     | galnt8a.2         |
| LOC799681       | LOC799681        | zmp:0000000951   | LOC100537673      |

**Table S2. Common differential genes between TNBS vs Control and LLTGRAGL vs TNBS**

| Gene               | TNBS-vs-Control |          |            | LLTRAGL-vs-TNBS |          |            |
|--------------------|-----------------|----------|------------|-----------------|----------|------------|
|                    | FoldChange      | q-value  | Regulation | FoldChange      | q-value  | Regulation |
| LOC100005207       | 13.76383        | 0.505931 | Up         | 0.037264        | 0.969268 | Down       |
| LOC100332535       | 0.33165         | 0.390691 | Down       | 2.891477        | 0.999748 | Up         |
| LOC100333286       | 0.146747        | 0.025995 | Down       | 9.705609        | 0.007064 | Up         |
| LOC100537673       | 37.17435        | 0.174205 | Up         | 0.026852        | 0.573022 | Down       |
| LOC101882112       | 0.191244        | 0.004407 | Down       | 3.454498        | 0.395912 | Up         |
| LOC101882465       | 0.447066        | 0.428148 | Down       | 3.016773        | 0.279018 | Up         |
| LOC101883438       | 0.270038        | 0.210117 | Down       | 5.524299        | 0.034646 | Up         |
| LOC101884955       | 3.4649          | 0.169207 | Up         | 0.247373        | 0.575013 | Down       |
| LOC103911298       | 0.240568        | 0.034416 | Down       | 7.700833        | 4.20E-06 | Up         |
| LOC103911768       | 7.726739        | 0.368211 | Up         | 0.130317        | 0.95503  | Down       |
| LOC110438230       | 0.046982        | 0.44136  | Down       | 21.11199        | 0.999748 | Up         |
| LOC110439345       | 17.09459        | 0.403948 | Up         | 0.05843         | 0.999748 | Down       |
| LOC570115          | 4.299965        | 0.505931 | Up         | 0.077302        | 0.474426 | Down       |
| bokb               | 2.093768        | 0.10603  | Up         | 0.494896        | 0.421222 | Down       |
| ccnd3              | 12.84518        | 0.18019  | Up         | 0.18164         | 0.999748 | Down       |
| cd28               | 0.169753        | 0.223188 | Down       | 4.525346        | 0.999748 | Up         |
| crybb2             | 7.178406        | 0.275846 | Up         | 0.137671        | 0.752366 | Down       |
| egr2a              | 0.482386        | 0.000754 | Down       | 0.465768        | 0.002823 | Down       |
| galnt8a.2          | 27.11974        | 0.329206 | Up         | 0.036802        | 0.958294 | Down       |
| gck                | 9.252051        | 0.480012 | Up         | 0.161531        | 0.999748 | Down       |
| grem1b             | 0.362372        | 0.256819 | Down       | 2.278969        | 0.999748 | Up         |
| kcnj1a.3           | 4.275583        | 0.000584 | Up         | 2.13613         | 0.04233  | Up         |
| kcnj1a.4           | 3.124943        | 0.106646 | Up         | 2.392634        | 0.160125 | Up         |
| nr5a1a             | 0.141945        | 0.250112 | Down       | 7.247171        | 0.768565 | Up         |
| rgs2               | 0.425123        | 0.360421 | Down       | 2.291183        | 0.009576 | Up         |
| setd1bb            | 0.411574        | 0.341259 | Down       | 2.443302        | 0.999748 | Up         |
| si:ch1073-153i20.3 | 7.921183        | 0.4873   | Up         | 0.131977        | 0.999748 | Down       |
| si:dkey-162h11.3   | 0.334929        | 0.254956 | Down       | 3.543544        | 0.395912 | Up         |
| si:dkey-206d17.12  | 0.476714        | 0.233237 | Down       | 2.112704        | 0.519949 | Up         |
| si:dkey-210i3.1    | 10.32547        | 0.148439 | Up         | 0.026357        | 0.164778 | Down       |
| si:dkey-78l4.10    | 16.35614        | 0.493061 | Up         | 0.061156        | 0.999748 | Down       |
| stx11b.2           | 0.308546        | 0.136307 | Down       | 2.742537        | 0.81103  | Up         |
| sult5a1            | 24.10545        | 0.000653 | Up         | 4.861383        | 0.95503  | Up         |
| tnfb               | 3.246856        | 0.360421 | Up         | 0.358116        | 0.999748 | Down       |
| zgc:162171         | 0.233836        | 0.353123 | Down       | 4.675054        | 0.909583 | Up         |

**Table S3. Differentially expressed genes in GO enrichment analysis circle**

| GOid       | Term                                                      |
|------------|-----------------------------------------------------------|
| GO:0006809 | nitric oxide biosynthetic process                         |
| GO:0015272 | ATP-activated inward rectifier potassium channel activity |
| GO:0004983 | neuropeptide Y receptor activity                          |
| GO:0005242 | inward rectifier potassium channel activity               |
| GO:0010107 | potassium ion import                                      |
| GO:0002548 | monocyte chemotaxis                                       |
| GO:0048020 | CCR chemokine receptor binding                            |
| GO:0048247 | lymphocyte chemotaxis                                     |
| GO:0071346 | cellular response to interferon-gamma                     |
| GO:0071347 | cellular response to interleukin-1                        |
| GO:0071356 | cellular response to tumor necrosis factor                |
| GO:0007160 | cell-matrix adhesion                                      |
| GO:0000786 | nucleosome                                                |
| GO:0006954 | inflammatory response                                     |
| GO:0005244 | voltage-gated ion channel activity                        |
| GO:0006915 | apoptotic process                                         |
| GO:0034765 | regulation of ion transmembrane transport                 |
| GO:0006955 | immune response                                           |
| GO:0006813 | potassium ion transport                                   |
| GO:0005525 | GTP binding                                               |

**Table S4. Gene names included in inflammatory reactions in GO enrichment analysis circle (order from top to bottom)**

|    | gene              |    | gene              |     | gene              |
|----|-------------------|----|-------------------|-----|-------------------|
| 1  | ccl20a.3          | 41 | park7             | 81  | tlr2              |
| 2  | nos2a             | 42 | tnfrsf21          | 82  | pik3ca            |
| 3  | tlr3              | 43 | ccl34b.1          | 83  | ccl34a.4          |
| 4  | si:dkey-23c22.5   | 44 | mapkapk2b         | 84  | ccl19b            |
| 5  | ccl20b            | 45 | uhfrf1            | 85  | si:ch211-195h23.3 |
| 6  | tnfrsf9a          | 46 | si:dkey-260g12.1  | 86  | fas               |
| 7  | si:rp71-17i16.5   | 47 | chuk              | 87  | ptgs1             |
| 8  | cxcl11.6          | 48 | syk               | 88  | cxcl8a            |
| 9  | rel               | 49 | pik3cb            | 89  | zgc:153759        |
| 10 | ccl38a.3          | 50 | tollip            | 90  | xcl32a.1          |
| 11 | nradd             | 51 | ccl34b.4          | 91  | tac4              |
| 12 | cd40              | 52 | agtr2             | 92  | ptgs2b            |
| 13 | cxcl20            | 53 | hdr               | 93  | il1b              |
| 14 | tlr8b             | 54 | elf3              | 94  | ccl25b            |
| 15 | pycard            | 55 | mpx               | 95  | mst1              |
| 16 | csf1ra            | 56 | si:ch211-261n11.8 | 96  | tnfrsf11a         |
| 17 | tlr9              | 57 | thbs1b            | 97  | sgk1              |
| 18 | cxcl11.7          | 58 | si:ch73-361p23.3  | 98  | ripk2             |
| 19 | tnfrsf9b          | 59 | chid1             | 99  | mmp25b            |
| 20 | il17c             | 60 | tnfa              | 100 | mapkapk2a         |
| 21 | nfkb1             | 61 | gbp4              | 101 | si:ch211-66k16.27 |
| 22 | il17d             | 62 | ccl34b.8          | 102 | ccl35.2           |
| 23 | ngfra             | 63 | pik3cg            | 103 | cxcr3.3           |
| 24 | ccl38a.5          | 64 | si:dkey-23c22.9   | 104 | nrros             |
| 25 | hrh1              | 65 | ccl19a.1          | 105 | pik3cd            |
| 26 | ccl19a.2          | 66 | ccl38a.4          | 106 | lox13b            |
| 27 | si:ch211-112c15.8 | 67 | lyn               | 107 | ptk2aa            |
| 28 | rela              | 68 | tnfrsfa           | 108 | si:dkey-42l23.4   |
| 29 | ccl20a.3          | 69 | cxcl8b.1          | 109 | cxcl11.5          |

---

|    |                  |    |                 |     |                   |
|----|------------------|----|-----------------|-----|-------------------|
| 30 | il17c            | 70 | ccl33.3         | 110 | zgc:158659        |
| 31 | tnfrsf1b         | 71 | jak2a           | 111 | si:ch211-261n11.7 |
| 32 | tlr1             | 72 | mmp25a          | 112 | zgc:153631        |
| 33 | si:ch211-131k2.2 | 73 | jak2b           | 113 | fpr1              |
| 34 | ngfrb            | 74 | zgc:153935      | 114 | relt              |
| 35 | relb             | 75 | tac1            | 115 | cxc3.1            |
| 36 | ccl44            | 76 | ccl36.1         | 116 | il17a/f3          |
| 37 | myd88            | 77 | lta4h           | 117 | il1fma            |
| 38 | lox13a           | 78 | ccl25a          | 118 | ptgs2a            |
| 39 | ikbkb            | 79 | si:dkey-23c22.6 | 119 | ccl38.1           |
| 40 | nfk2             | 80 | ccl18b          |     |                   |

---

**Table S5. Corresponding Paths in the Chord Graph of TNBS vs Control and LLTGRAGL vs TNBS KEGG Analysis**

| TNBS-vs-Control                             | LLTGRAGL-vs-TNBS                            |
|---------------------------------------------|---------------------------------------------|
| Amino sugar and nucleotide sugar metabolism | Cytokine-cytokine receptor interaction      |
| Starch and sucrose metabolism               | Necroptosis                                 |
| C-type lectin receptor signaling pathway    | Steroid hormone biosynthesis                |
| Cytokine-cytokine receptor interaction      | Arachidonic acid metabolism                 |
| Hedgehog signaling pathway                  | Amino sugar and nucleotide sugar metabolism |
| Phagosome                                   | NOD-like receptor signaling pathway         |
| Cell adhesion molecules                     | Insulin signaling pathway                   |
| NOD-like receptor signaling pathway         | alpha-Linolenic acid metabolism             |
| FoxO signaling pathway                      | Arginine biosynthesis                       |
| Steroid hormone biosynthesis                | Linoleic acid metabolism                    |

**Table S6. Sequence of Primers Used in qPCR**

| Gene              | mer orientation | Nucleotide sequence       |
|-------------------|-----------------|---------------------------|
| <i>β-actin</i>    | Forward         | GCATTGCTGACCGTATGCAG      |
|                   | Reverse         | ACTCCTGCTTGCTGATCCAC      |
| <i>nod2</i>       | Forward         | GCAAGGAGGGGGTTGATTGT      |
|                   | Reverse         | TCTGCATTCTTGCTGGCTCA      |
| <i>myd88</i>      | Forward         | ACGGCTAATCCCTGTCGTCT      |
|                   | Reverse         | CAGATGGTCAGAAAGCGCAG      |
| <i>nlrp1</i>      | Forward         | AAATGTGGACACCGTTGCAG      |
|                   | Reverse         | ACTGGTTGATTTGTGATGTATGATT |
| <i>nlrp3</i>      | Forward         | AGCTCACGTTTCATCTGCTTCT    |
|                   | Reverse         | GACCCGTCCATTTCAGTCTCC     |
| <i>pycard</i>     | Forward         | CGCGTCACAAAGTCTGCAAT      |
|                   | Reverse         | TTTGATGTGAACACGCCGAC      |
| <i>nfkb</i>       | Forward         | AGAGGACAATCTTCCGTCGC      |
|                   | Reverse         | GGGTCTCTACGGGATAACGC      |
| <i>tnfa</i>       | Forward         | GGAGAGTTGCCTTTACCGCT      |
|                   | Reverse         | CCTGGGTCTTATGGAGCGTG      |
| <i>mmp9</i>       | Forward         | CATCCGCAACTACAAGACATTC    |
|                   | Reverse         | GGTCCAGTATTCATCGTCATCA    |
| <i>il8</i>        | Forward         | TCCTGGCATTCTGACCATCAT     |
|                   | Reverse         | ATGCGTCGGCTTTCTGTTTC      |
| <i>Il1β</i>       | Forward         | GTGGACTTCGCAGCACAAAA      |
|                   | Reverse         | AAGACGGCACTGAATCCACC      |
| <i>Il12</i>       | Forward         | CGACAATGAGGGCTCCTACC      |
|                   | Reverse         | ATGTCTGTTCTCACCCACG       |
| <i>cox2</i>       | Forward         | ATCATTCTTGGAGCGGTCTACT    |
|                   | Reverse         | TACTCTGAGCGATGACATAGGC    |
| <i>tgfb</i>       | Forward         | GAACCTCGCTTTGTCTCCA       |
|                   | Reverse         | TACAGTCGCAGTATAACCTCA     |
| <i>Il10</i>       | Forward         | CGGGATATGGTGAAATGCAAGA    |
|                   | Reverse         | AGAGCAAATCAAGCTCCCCC      |
| <i>caspaase-9</i> | Forward         | CTGAGGCAAGCCATAATCG       |
|                   | Reverse         | AGAGGACATGGGAATAGCGT      |
| <i>ripk1</i>      | Forward         | TGATGTACGAGAGCCACACG      |
|                   | Reverse         | TACGAGCCACTTGCTTCCAG      |
| <i>ripk3</i>      | Forward         | TTGTCCCGAGTGGCTGAAAA      |

|                  |         |                       |
|------------------|---------|-----------------------|
| <i>caspase-1</i> | Reverse | ACGGCTCCTTCCCAGTGATA  |
|                  | Forward | TCAGCAAAGGAAATGGAT    |
| <i>tlr4</i>      | Reverse | TTAGACGGCGGTAGACAT    |
|                  | Forward | ACACATTGAACCAGGAGCTT  |
| <i>bax</i>       | Reverse | TGTCCACGAAATGAAAGCCG  |
|                  | Forward | TACTTTGCCTGTCGCCTTGT  |
|                  | Reverse | AGCGAGGAAAAC TCCGACTG |

---



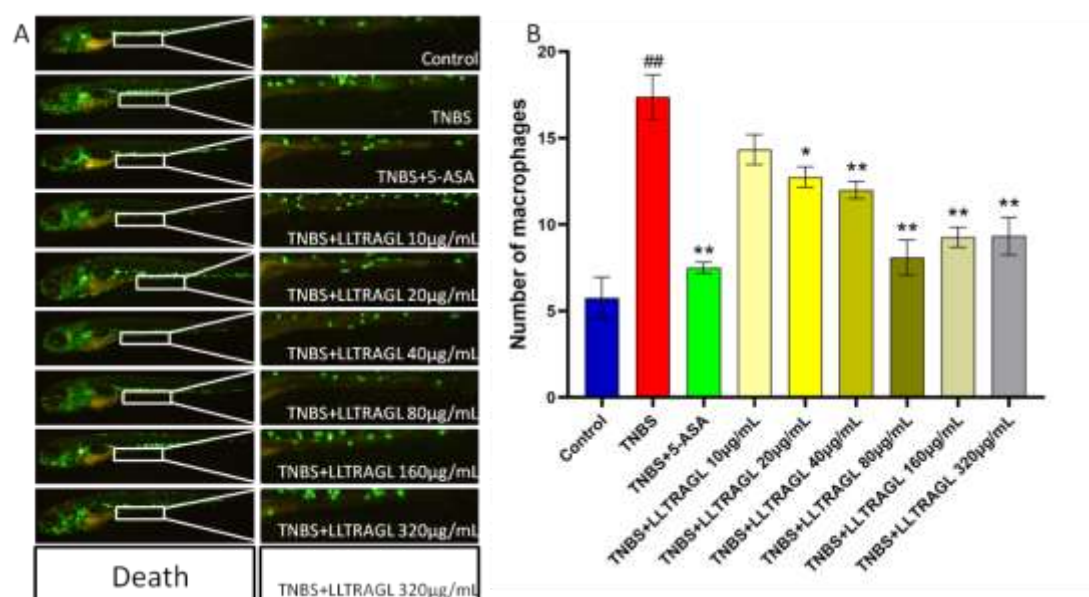

Figure S1: The safe doses screening of LLTRAGL at 10, 20, 40, 80, 160, 320 and 640  $\mu$ g/mL

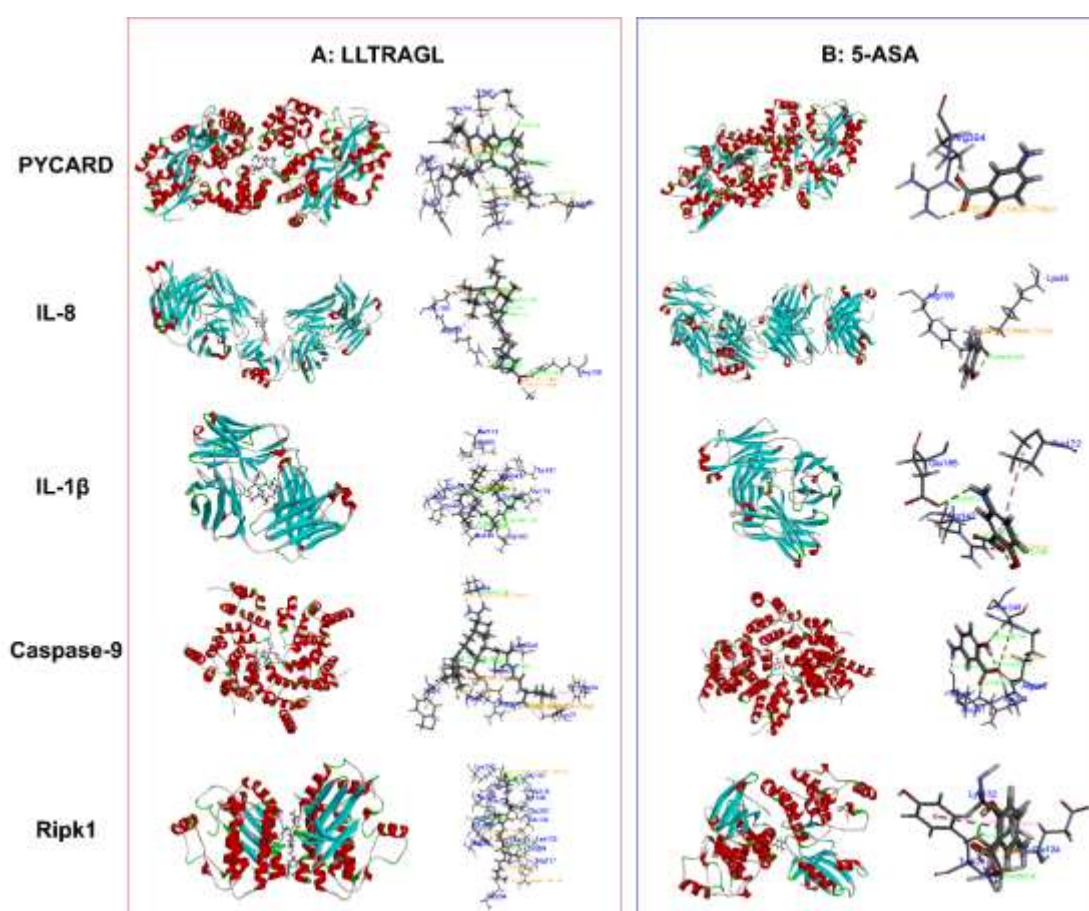

Figure S2. 3D diagrams of LLTRAGL and 5-ASA docked with 6KI0, 6WZL, 7Z3W, 5WVC and 7YDX molecules, respectively

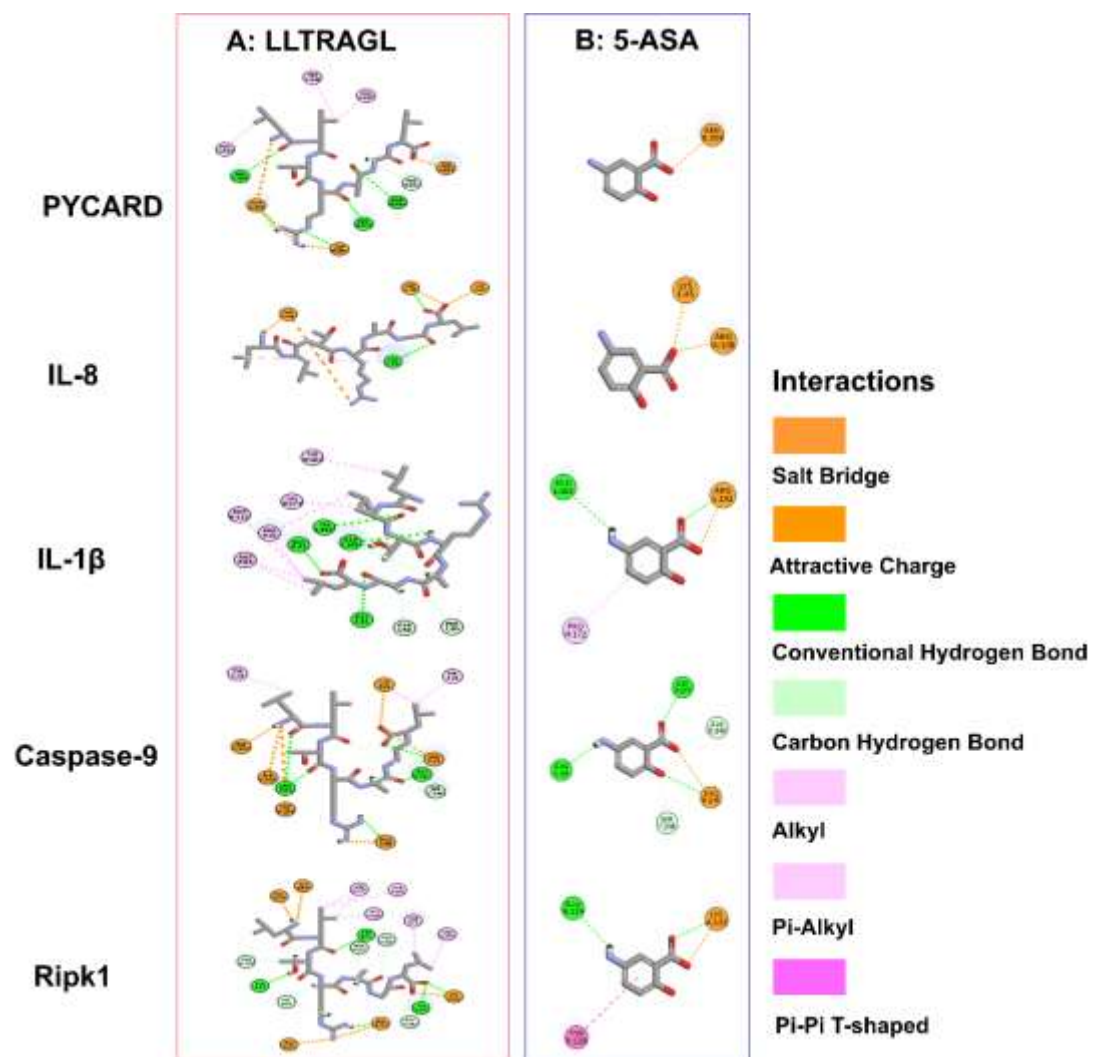

Figure S3. 2D diagrams of LLTRAGL and 5-ASA docked with 6KI0, 6WZL, 7Z3W, 5WVC and 7YDX molecules, respectively
